# Supplementary material
Source: PubMed Central journal article supplement (PMC1287963)

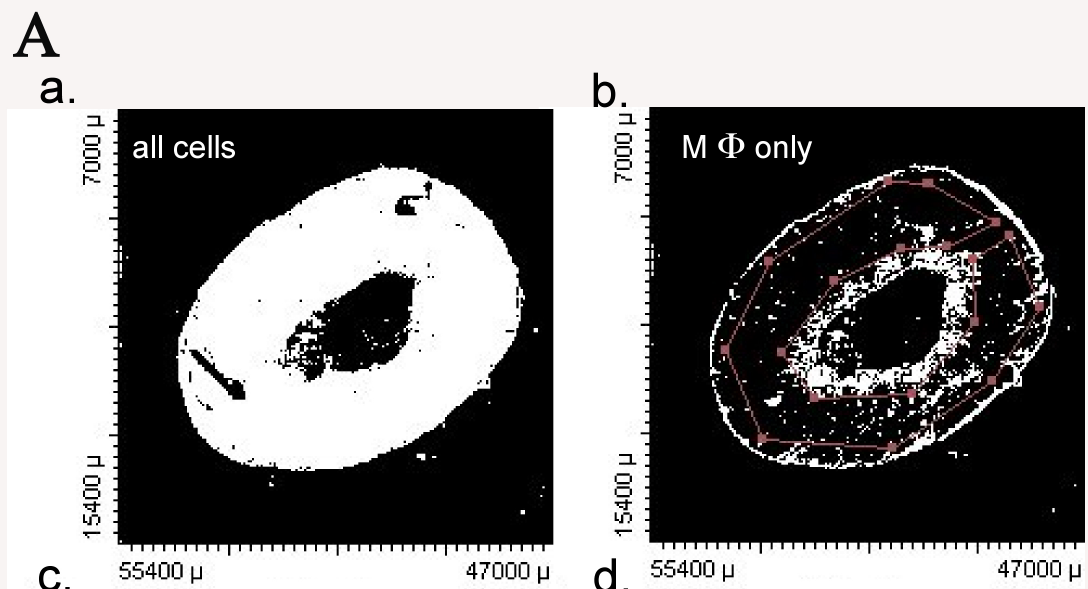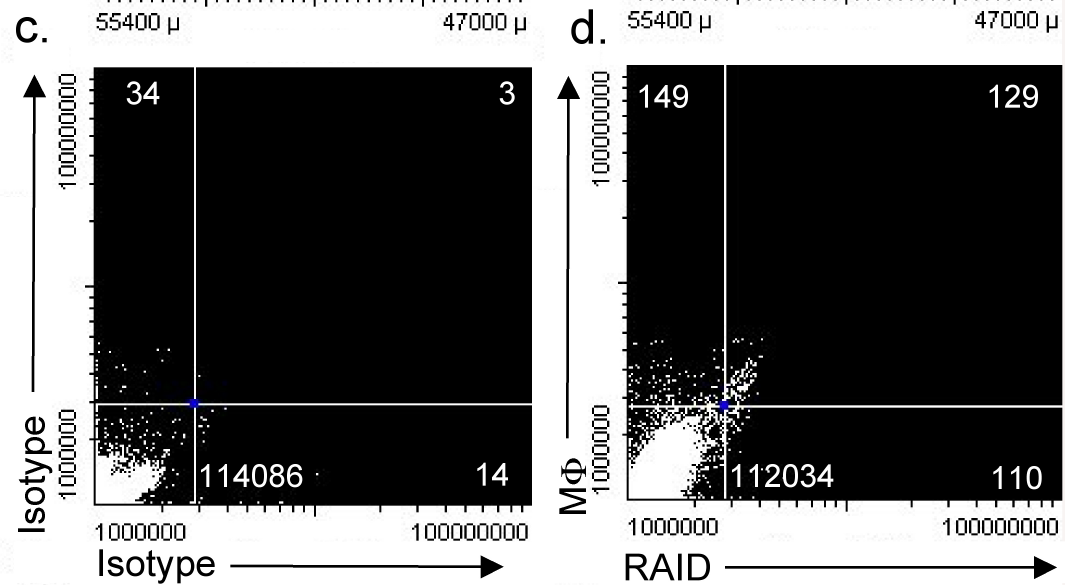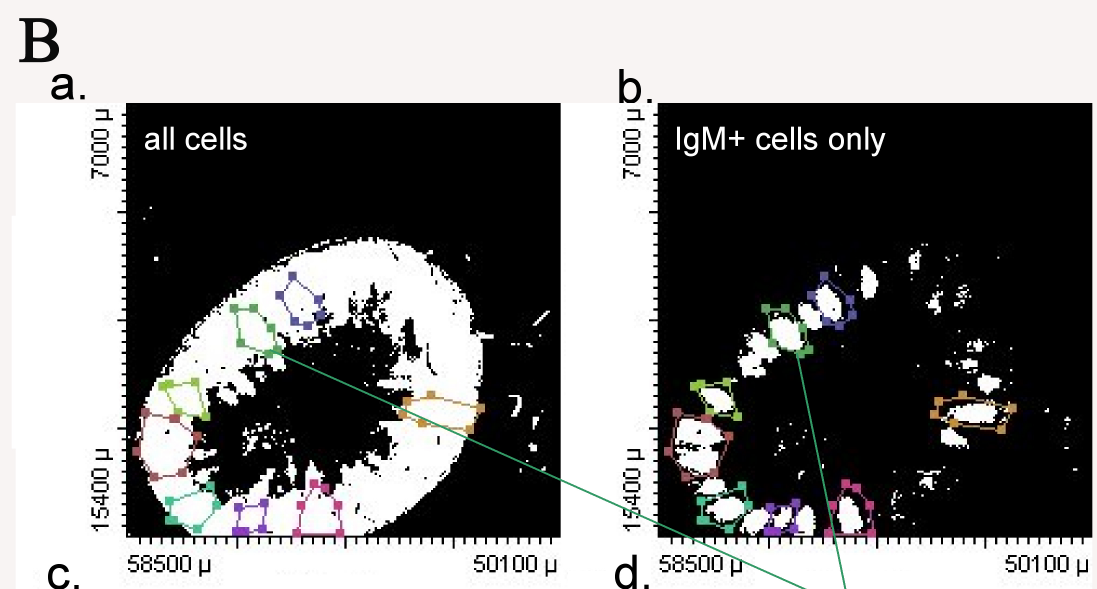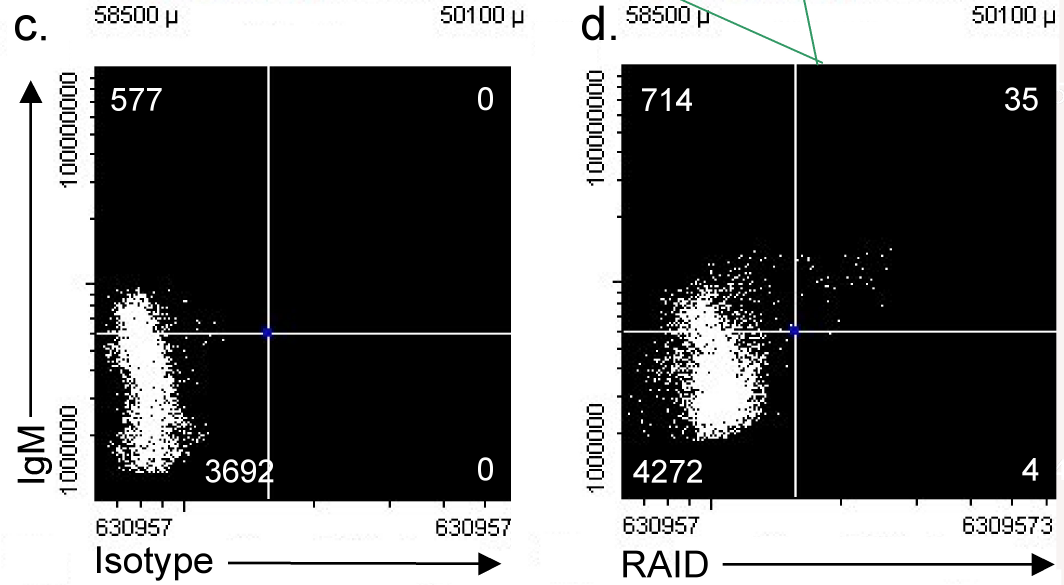

Supplement: pnas_0501338102_1.pdf [file pnas_0501338102_1.pdf]
